# Supplementary material
Source: Springer Nature journal article supplement (https://www.springermedizin.de/resource/supplementary/12947_2013_494_MOESM5_ESM.pdf/9555886)

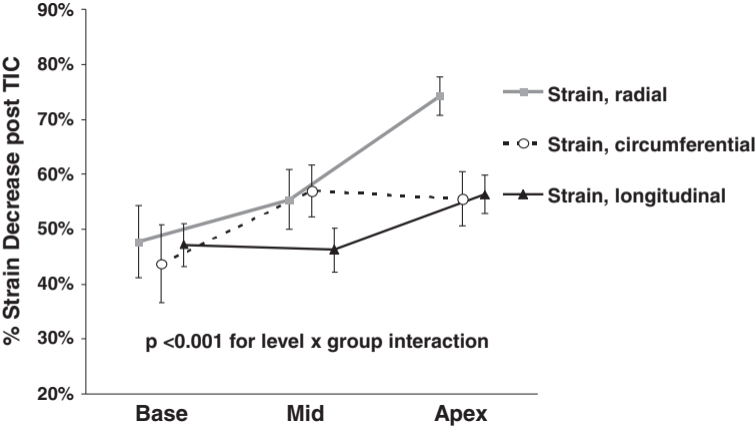

Supplement: MOESM5 [file 9555886]
